# Supplementary material
Source: PubMed Central journal article supplement (PMC3074411)

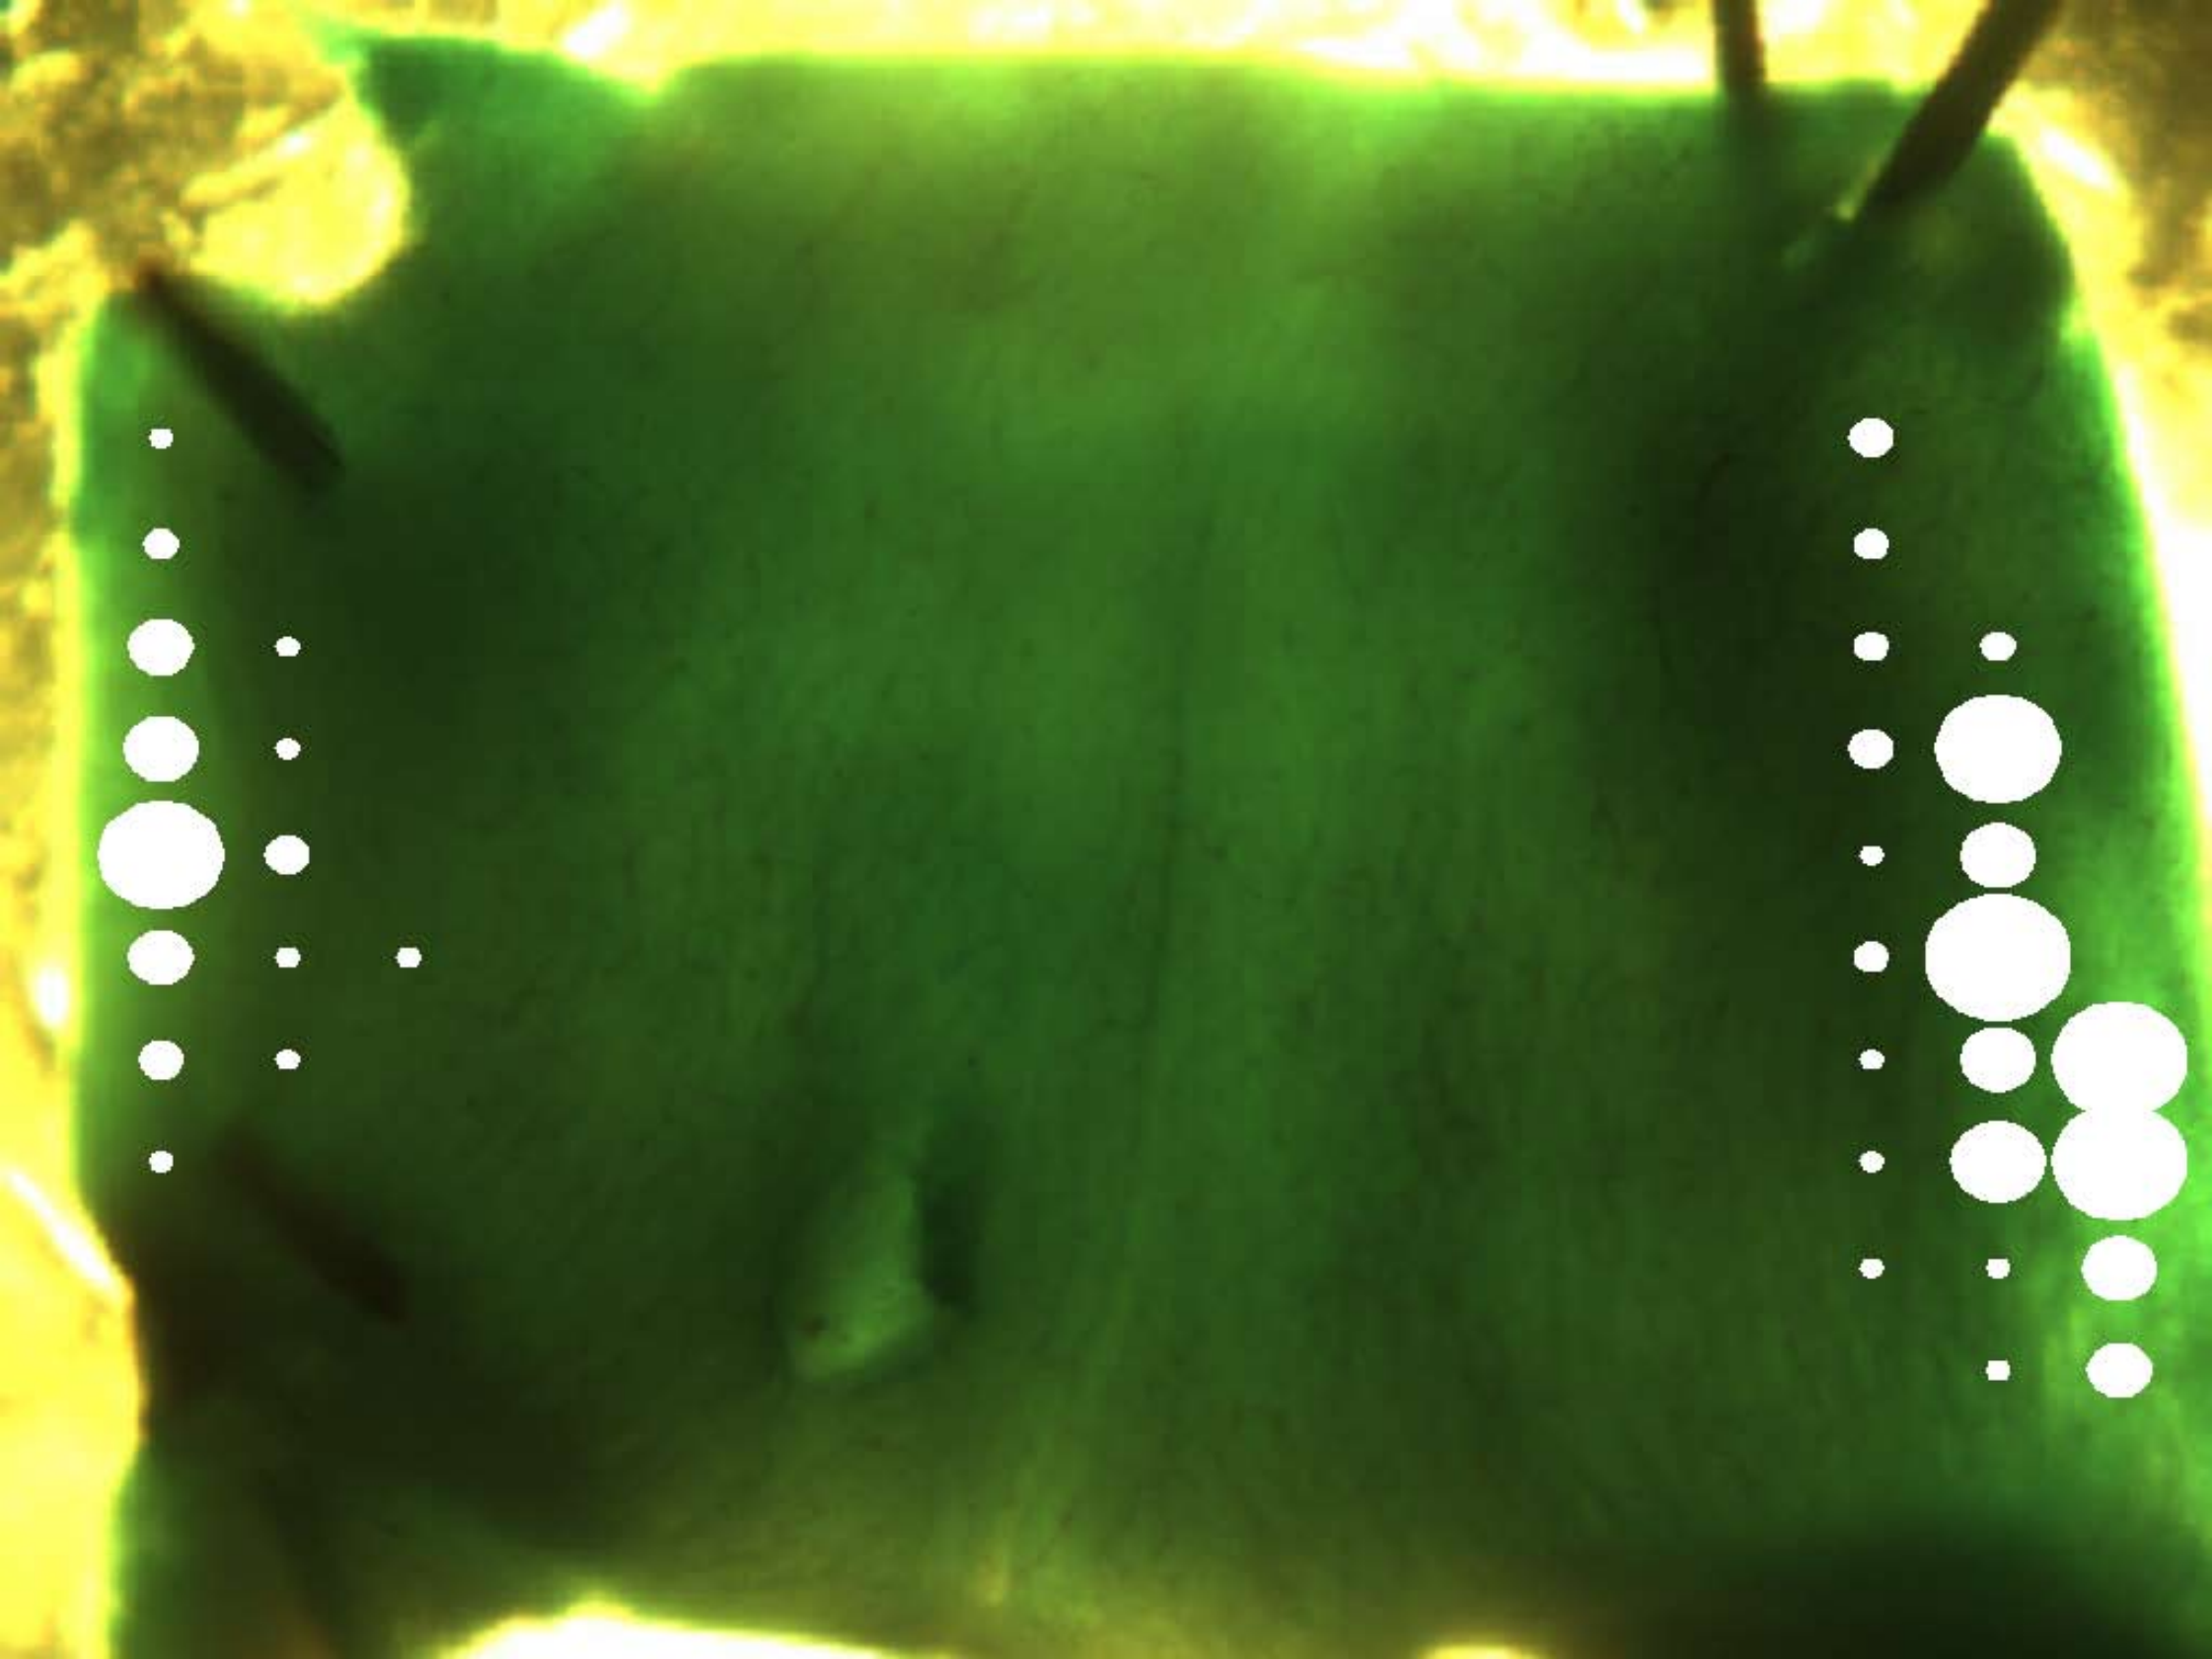

Supplement: supp_00986.2009_figS2a.pdf [file supp_00986.2009_figS2a.pdf]
